# Supplementary material for: Preliminary Feasibility of Near-Infrared Spectroscopy to Authenticate Grazing in Dairy Goats through Milk and Faeces Analysis
Source: MDPI journal article supplement (doi:10.3390/ani13152440), 2023-07-28
Supplement: s1 [file s1]

**Table S1.** Confusion matrices obtained in calibration and external validation for the six algorithms performed using NIRS spectra of faeces samples. 1

| Algorithm      | Mathematical treatment | Model calibration        |                    |                          |                       | Model validation         |                   |                      |                          |         |                   |       |
|----------------|------------------------|--------------------------|--------------------|--------------------------|-----------------------|--------------------------|-------------------|----------------------|--------------------------|---------|-------------------|-------|
|                |                        | Groups                   | Model prediction   |                          | Classifica-<br>tion % | Groups                   | Model prediction  |                      | Classifica-<br>tion %    |         |                   |       |
|                |                        |                          | Graz-<br>ing       | Intensive<br>feeding     |                       |                          | Graz-<br>ing      | Intensive<br>feeding |                          |         |                   |       |
| PLS2           | 1,5,1,1 no scatter     | Real classi-<br>fication | Grazing            | 26                       | 100%                  | Real classi-<br>fication | Grazing           | 3                    | 81.8%                    |         |                   |       |
|                |                        |                          | Intensive feeding  | 0                        |                       |                          | 29                | Intensive feeding    |                          | 0       | 6                 |       |
|                | 2,5,1,1 no scatter     |                          | Grazing            | 26                       | 100%                  |                          | Grazing           | 5                    | 100%                     |         |                   |       |
|                |                        |                          | Intensive feeding  | 0                        |                       |                          | 29                | Intensive feeding    |                          | 0       | 6                 |       |
|                | 1,5,1,1 SNV+DT         |                          | Grazing            | 26                       | 100%                  |                          | Grazing           | 5                    | 100%                     |         |                   |       |
|                |                        |                          | Intensive feeding  | 0                        |                       |                          | 29                | Intensive feeding    |                          | 0       | 6                 |       |
|                | 2,5,1,1 SNV+DT         |                          | Grazing            | 25                       | 96.4%                 |                          | Grazing           | 4                    | 90.9%                    |         |                   |       |
|                |                        |                          | Intensive feeding  | 1                        |                       |                          | 28                | Intensive feeding    |                          | 0       | 6                 |       |
|                | Correlation            |                          | 1,5,1,1 no scatter | Real classi-<br>fication | Grazing               |                          | 21                | 87.3%                | Real classi-<br>fication | Grazing | 4                 | 90.9% |
|                |                        |                          |                    |                          | Intensive feeding     |                          | 2                 |                      |                          | 27      | Intensive feeding |       |
|                |                        |                          | 2,5,1,1 no scatter |                          | Grazing               |                          | 24                | 90.9%                |                          | Grazing | 3                 | 81.8% |
|                |                        |                          |                    |                          | Intensive feeding     |                          | 3                 |                      |                          | 26      | Intensive feeding |       |
| 1,5,1,1 SNV+DT |                        | Grazing                  | 21                 |                          | 87.3%                 | Grazing                  | 4                 | 90.9%                |                          |         |                   |       |
|                |                        | Intensive feeding        | 2                  |                          |                       | 27                       | Intensive feeding |                      |                          | 0       | 6                 |       |

|                      |                     |                                   |                   |                   |                                   |                   |                   |                   |                  |       |
|----------------------|---------------------|-----------------------------------|-------------------|-------------------|-----------------------------------|-------------------|-------------------|-------------------|------------------|-------|
|                      |                     | <div><div></div><div></div></div> |                   |                   | <div><div></div><div></div></div> |                   |                   |                   |                  |       |
|                      |                     | Grazing                           | 24                | 2                 | 90.9%                             | Grazing           | 3                 | 2                 | 81.8%            |       |
| 2,5,1,1 SNV+DT       |                     | Intensive feeding                 | 3                 | 26                |                                   | Intensive feeding | 0                 | 6                 |                  |       |
|                      |                     |                                   |                   |                   |                                   |                   |                   |                   |                  |       |
| Maximum distance     | Real classification | Groups                            | Model prediction  |                   | Classification %                  | Groups            | Model prediction  |                   | Classification % |       |
|                      |                     |                                   | Graz-ing          | Intensive feeding |                                   |                   | Graz-ing          | Intensive feeding |                  |       |
|                      |                     | 1,5,1,1 no scatter                | Grazing           | 25                | 1                                 | 94.5%             | Grazing           | 3                 | 2                | 81.8% |
|                      |                     |                                   | Intensive feeding | 2                 | 27                                |                   | Intensive feeding | 0                 | 6                |       |
|                      |                     | 2,5,1,1 no scatter                | Grazing           | 26                | 0                                 | 96.4%             | Grazing           | 3                 | 2                | 81.8% |
|                      |                     |                                   | Intensive feeding | 2                 | 27                                |                   | Intensive feeding | 0                 | 6                |       |
|                      |                     | 1,5,1,1 SNV+DT                    | Grazing           | 26                | 0                                 | 96.4%             | Grazing           | 2                 | 3                | 72.7% |
|                      |                     |                                   | Intensive feeding | 2                 | 27                                |                   | Intensive feeding | 0                 | 6                |       |
|                      |                     | 2,5,1,1 SNV+DT                    | Grazing           | 25                | 1                                 | 94.5%             | Grazing           | 1                 | 4                | 54.5% |
|                      |                     |                                   | Intensive feeding | 2                 | 27                                |                   | Intensive feeding | 1                 | 5                |       |
|                      |                     |                                   |                   |                   |                                   |                   |                   |                   |                  |       |
| Mahalanobis distance | Real classification | Groups                            | Model prediction  |                   | Classification %                  | Groups            | Model prediction  |                   | Classification % |       |
|                      |                     |                                   | Graz-ing          | Intensive feeding |                                   |                   | Graz-ing          | Intensive feeding |                  |       |
|                      |                     | 1,5,1,1 no scatter                | Grazing           | 26                | 0                                 | 89.1%             | Grazing           | 4                 | 1                | 90.9% |
|                      |                     |                                   | Intensive feeding | 6                 | 23                                |                   | Intensive feeding | 0                 | 6                |       |
|                      |                     | 2,5,1,1 no scatter                | Grazing           | 25                | 1                                 | 89.1%             | Grazing           | 4                 | 1                | 90.9% |
|                      |                     |                                   | Intensive feeding | 5                 | 24                                |                   | Intensive feeding | 0                 | 6                |       |

|                         |                          |                   |                  |                      |                       |                   |                  |                      |                       |
|-------------------------|--------------------------|-------------------|------------------|----------------------|-----------------------|-------------------|------------------|----------------------|-----------------------|
|                         |                          |                   |                  |                      |                       |                   |                  |                      |                       |
|                         |                          | Grazing           | 26               | 0                    | 87.3%                 | Grazing           | 5                | 0                    | 100%                  |
| 1,5,1,1 SNV+DT          |                          | Intensive feeding | 7                | 22                   |                       | Intensive feeding | 0                | 6                    |                       |
|                         |                          | Grazing           | 25               | 1                    | 87.3%                 | Grazing           | 1                | 4                    | 54.5%                 |
| 2,5,1,1 SNV+DT          |                          | Intensive feeding | 6                | 23                   |                       | Intensive feeding | 1                | 5                    |                       |
|                         |                          |                   |                  |                      |                       |                   |                  |                      |                       |
|                         |                          | Groups            | Model prediction |                      | Classifica-<br>tion % | Groups            | Model prediction |                      | Classifica-<br>tion % |
|                         |                          |                   | Graz-<br>ing     | Intensive<br>feeding |                       |                   | Graz-<br>ing     | Intensive<br>feeding |                       |
|                         |                          |                   |                  |                      |                       |                   |                  |                      |                       |
|                         |                          | Grazing           | 26               | 0                    | 100%                  | Grazing           | 4                | 1                    | 90.9%                 |
| 1,5,1,1 no scatter      |                          | Intensive feeding | 0                | 29                   |                       | Intensive feeding | 0                | 6                    |                       |
|                         |                          | Grazing           | 26               | 0                    | 100%                  | Grazing           | 5                | 0                    | 100%                  |
| X-residuals             | 2,5,1,1 no scatter       | Intensive feeding | 0                | 29                   |                       | Intensive feeding | 0                | 6                    |                       |
|                         | Real classi-<br>fication | Grazing           | 26               | 0                    | 100%                  | Grazing           | 5                | 0                    | 100%                  |
|                         |                          | Intensive feeding | 0                | 29                   |                       | Intensive feeding | 0                | 6                    |                       |
|                         |                          | Grazing           | 26               | 0                    | 100%                  | Grazing           | 5                | 0                    | 100%                  |
|                         |                          | Intensive feeding | 0                | 29                   |                       | Intensive feeding | 0                | 6                    |                       |
|                         | 1,5,1,1 SNV+DT           | Grazing           | 26               | 0                    | 100%                  | Grazing           | 5                | 0                    | 100%                  |
|                         |                          | Intensive feeding | 0                | 29                   |                       | Intensive feeding | 0                | 6                    |                       |
|                         |                          | Grazing           | 26               | 0                    | 100%                  | Grazing           | 5                | 0                    | 100%                  |
| 2,5,1,1 SNV+DT          |                          | Intensive feeding | 0                | 29                   |                       | Intensive feeding | 0                | 6                    |                       |
|                         |                          |                   |                  |                      |                       |                   |                  |                      |                       |
|                         |                          | Groups            | Model prediction |                      | Classifica-<br>tion % | Groups            | Model prediction |                      | Classifica-<br>tion % |
|                         |                          |                   | Graz-<br>ing     | Intensive<br>feeding |                       |                   | Graz-<br>ing     | Intensive<br>feeding |                       |
|                         |                          |                   |                  |                      |                       |                   |                  |                      |                       |
|                         |                          | Grazing           | 25               | 1                    | 96.4%                 | Grazing           | 4                | 1                    | 90.9%                 |
| Maximum X-<br>residuals | 1,5,1,1 no scatter       | Intensive feeding | 1                | 28                   |                       | Intensive feeding | 0                | 6                    |                       |

|                    |                   |    |    |       |                   |   |   |       |
|--------------------|-------------------|----|----|-------|-------------------|---|---|-------|
| 2,5,1,1 no scatter | Grazing           | 26 | 0  | 98.2% | Grazing           | 4 | 1 | 90.9% |
|                    | Intensive feeding | 1  | 28 |       | Intensive feeding | 0 | 6 |       |
| 1,5,1,1 SNV+DT     | Grazing           | 25 | 1  | 96.4% | Grazing           | 5 | 0 | 100%  |
|                    | Intensive feeding | 1  | 28 |       | Intensive feeding | 0 | 6 |       |
| 2,5,1,1 SNV+DT     | Grazing           | 26 | 0  | 100%  | Grazing           | 5 | 0 | 100%  |
|                    | Intensive feeding | 0  | 29 |       | Intensive feeding | 0 | 6 |       |

No scatter: no scatter effect correction performed; SNV + DT: Standard Normal Variate and De-trending transformation.

**Table 2.** Confusion matrices obtained in calibration and external validation for the six algorithms performed using NIRS spectra of milk samples.

| Algorithm   | Mathematical treatment | Model calibration        |                   |                      |                       | Model validation  |                  |                      |                       |
|-------------|------------------------|--------------------------|-------------------|----------------------|-----------------------|-------------------|------------------|----------------------|-----------------------|
|             |                        | Groups                   | Model prediction  |                      | Classifica-<br>tion % | Groups            | Model prediction |                      | Classifica-<br>tion % |
|             |                        |                          | Graz-<br>ing      | Intensive<br>feeding |                       |                   | Graz-<br>ing     | Intensive<br>feeding |                       |
| PLS2        | 1,5,1,1 no scatter     | Real classi-<br>fication | Grazing           | 18                   | 78.6%                 | Grazing           | 7                | 0                    | 100%                  |
|             |                        |                          | Intensive feeding | 5                    |                       | Intensive feeding | 0                | 8                    |                       |
|             | 2,5,1,1 no scatter     |                          | Grazing           | 22                   | 94.6%                 | Grazing           | 7                | 0                    | 100%                  |
|             |                        |                          | Intensive feeding | 0                    |                       | Intensive feeding | 0                | 8                    |                       |
|             | 1,5,1,1 SNV+DT         |                          | Grazing           | 24                   | 98.2%                 | Grazing           | 4                | 3                    | 73.3%                 |
|             |                        |                          | Intensive feeding | 0                    |                       | Intensive feeding | 1                | 7                    |                       |
|             | 2,5,1,1 SNV+DT         |                          | Grazing           | 18                   | 80.4%                 | Grazing           | 4                | 3                    | 73.3%                 |
|             |                        |                          | Intensive feeding | 4                    |                       | Intensive feeding | 1                | 7                    |                       |
|             |                        | Groups                   | Model prediction  |                      | Classifica-<br>tion % | Groups            | Model prediction |                      | Classifica-<br>tion % |
|             |                        |                          | Graz-<br>ing      | Intensive<br>feeding |                       |                   | Graz-<br>ing     | Intensive<br>feeding |                       |
| Correlation | 1,5,1,1 no scatter     | Real classi-<br>fication | Grazing           | 21                   | 87.5%                 | Grazing           | 6                | 1                    | 93.3%                 |
|             |                        |                          | Intensive feeding | 3                    |                       | Intensive feeding | 0                | 8                    |                       |
|             | 2,5,1,1 no scatter     |                          | Grazing           | 22                   | 92.9%                 | Grazing           | 7                | 0                    | 100%                  |
|             |                        |                          | Intensive feeding | 1                    |                       | Intensive feeding | 0                | 8                    |                       |
|             | 1,5,1,1 SNV+DT         |                          | Grazing           | 22                   | 85.7%                 | Grazing           | 6                | 1                    | 93.3%                 |
|             |                        |                          | Intensive feeding | 5                    |                       | Intensive feeding | 0                | 8                    |                       |

|                         |                    |                          |                   |                      |                       |                       |                          |                   |                  |        |                       |  |                       |  |
|-------------------------|--------------------|--------------------------|-------------------|----------------------|-----------------------|-----------------------|--------------------------|-------------------|------------------|--------|-----------------------|--|-----------------------|--|
|                         |                    |                          |                   |                      |                       |                       |                          |                   |                  |        |                       |  |                       |  |
| 2,5,1,1 SNV+DT          |                    |                          | Grazing           | 22                   | 3                     | 87.5%                 |                          | Grazing           | 7                | 0      | 100%                  |  |                       |  |
|                         |                    |                          | Intensive feeding | 4                    | 27                    |                       |                          | Intensive feeding | 0                | 8      |                       |  |                       |  |
|                         |                    |                          |                   |                      |                       |                       |                          |                   |                  |        |                       |  |                       |  |
|                         |                    | Groups                   | Model prediction  |                      | Classifica-<br>tion % |                       |                          | Groups            | Model prediction |        | Classifica-<br>tion % |  |                       |  |
|                         |                    |                          | Graz-<br>ing      | Intensive<br>feeding |                       | Graz-<br>ing          | Intensive<br>feeding     |                   |                  |        |                       |  |                       |  |
| Maximum dis-<br>tance   | 1,5,1,1 no scatter | Real classi-<br>fication | Grazing           | 24                   | 1                     | 94.6%                 | Real classi-<br>fication | Grazing           | 7                | 0      | 100%                  |  |                       |  |
|                         |                    |                          | Intensive feeding | 2                    | 29                    |                       |                          | Intensive feeding | 0                | 8      |                       |  |                       |  |
|                         | 2,5,1,1 no scatter |                          | Grazing           | 23                   | 2                     | 78.6%                 |                          | Grazing           | 7                | 0      | 80%                   |  |                       |  |
|                         |                    |                          | Intensive feeding | 10                   | 21                    |                       |                          | Intensive feeding | 3                | 5      |                       |  |                       |  |
|                         | 1,5,1,1 SNV+DT     |                          | Grazing           | 24                   | 1                     | 98.2%                 |                          | Grazing           | 7                | 0      | 100%                  |  |                       |  |
|                         |                    |                          | Intensive feeding | 0                    | 31                    |                       |                          | Intensive feeding | 0                | 8      |                       |  |                       |  |
|                         | 2,5,1,1 SNV+DT     |                          | Grazing           | 24                   | 1                     | 94.6%                 |                          | Grazing           | 6                | 1      | 80%                   |  |                       |  |
|                         |                    |                          | Intensive feeding | 2                    | 29                    |                       |                          | Intensive feeding | 2                | 6      |                       |  |                       |  |
|                         |                    |                          |                   |                      |                       |                       |                          |                   |                  |        |                       |  |                       |  |
|                         |                    |                          | Groups            | Model prediction     |                       | Classifica-<br>tion % |                          |                   |                  | Groups | Model prediction      |  | Classifica-<br>tion % |  |
|                         |                    | Graz-<br>ing             |                   | Intensive<br>feeding | Graz-<br>ing          |                       | Intensive<br>feeding     |                   |                  |        |                       |  |                       |  |
| Mahalanobis<br>distance | 1,5,1,1 no scatter | Real classi-<br>fication | Grazing           | 25                   | 0                     | 87.5%                 | Real classi-<br>fication | Grazing           | 7                | 0      | 80%                   |  |                       |  |
|                         |                    |                          | Intensive feeding | 7                    | 24                    |                       |                          | Intensive feeding | 3                | 5      |                       |  |                       |  |
|                         | 2,5,1,1 no scatter |                          | Grazing           | 23                   | 2                     | 76.8%                 |                          | Grazing           | 7                | 0      | 73.3%                 |  |                       |  |
|                         |                    |                          | Intensive feeding | 11                   | 20                    |                       |                          | Intensive feeding | 4                | 4      |                       |  |                       |  |
|                         | 1,5,1,1 SNV+DT     |                          | Grazing           | 25                   | 0                     | 92.9%                 |                          | Grazing           | 7                | 0      | 93.3%                 |  |                       |  |
|                         |                    |                          |                   |                      |                       |                       |                          |                   |                  |        |                       |  |                       |  |

|                    |                     |         |                     |                     |                   |                  |                   |                   |                   |                  |                  |  |
|--------------------|---------------------|---------|---------------------|---------------------|-------------------|------------------|-------------------|-------------------|-------------------|------------------|------------------|--|
|                    |                     |         |                     |                     |                   |                  |                   |                   |                   |                  |                  |  |
| 2,5,1,1 SNV+DT     |                     |         | Intensive feeding   | 4                   | 27                | 85.7%            | Intensive feeding | 1                 | 7                 | 73.3%            |                  |  |
|                    |                     |         | Grazing             | 24                  | 1                 |                  | Grazing           | 7                 | 0                 |                  |                  |  |
|                    |                     |         | Intensive feeding   | 7                   | 24                |                  | Intensive feeding | 4                 | 4                 |                  |                  |  |
|                    |                     |         |                     |                     |                   |                  |                   |                   |                   |                  |                  |  |
| X-residuals        | Real classification |         | Groups              | Model prediction    |                   | Classification % | Groups            | Model prediction  |                   | Classification % |                  |  |
|                    |                     |         |                     | Grazing             | Intensive feeding |                  |                   | Grazing           | Intensive feeding |                  |                  |  |
|                    |                     |         | 1,5,1,1 no scatter  | Grazing             | 21                | 4                | 92.9%             | Grazing           | 4                 | 3                | 73.3%            |  |
|                    |                     |         |                     | Intensive feeding   | 0                 | 31               |                   | Intensive feeding | 1                 | 7                |                  |  |
|                    |                     |         | 2,5,1,1 no scatter  | Grazing             | 22                | 3                | 89.3%             | Grazing           | 7                 | 0                | 100%             |  |
|                    |                     |         |                     | Intensive feeding   | 3                 | 28               |                   | Intensive feeding | 0                 | 8                |                  |  |
|                    |                     |         | 1,5,1,1 SNV+DT      | Grazing             | 24                | 1                | 98.2%             | Grazing           | 7                 | 0                | 100%             |  |
|                    |                     |         |                     | Intensive feeding   | 0                 | 31               |                   | Intensive feeding | 0                 | 8                |                  |  |
|                    |                     |         | 2,5,1,1 SNV+DT      | Grazing             | 25                | 0                | 98.2%             | Grazing           | 7                 | 0                | 93.3%            |  |
|                    |                     |         |                     | Intensive feeding   | 1                 | 30               |                   | Intensive feeding | 1                 | 7                |                  |  |
|                    |                     |         |                     |                     |                   |                  |                   |                   |                   |                  |                  |  |
|                    |                     |         | Maximum X-residuals | Real classification |                   | Groups           | Model prediction  |                   | Classification %  | Groups           | Model prediction |  |
| Grazing            | Intensive feeding   | Grazing |                     |                     |                   |                  | Intensive feeding |                   |                   |                  |                  |  |
| 1,5,1,1 no scatter | Grazing             | 25      |                     |                     |                   | 0                | 100%              | Grazing           | 5                 | 2                | 86.7%            |  |
|                    | Intensive feeding   | 0       |                     |                     |                   | 31               |                   | Intensive feeding | 0                 | 8                |                  |  |
| 2,5,1,1 no scatter | Grazing             | 24      |                     |                     |                   | 1                | 96.4%             | Grazing           | 6                 | 1                | 93.3%            |  |
|                    |                     |         |                     |                     |                   |                  |                   |                   |                   |                  |                  |  |

|                |                      |    |    |       |                      |   |   |       |
|----------------|----------------------|----|----|-------|----------------------|---|---|-------|
|                | Intensive<br>feeding | 1  | 30 |       | Intensive<br>feeding | 0 | 8 |       |
|                | Grazing              | 25 | 0  |       | Grazing              | 6 | 1 |       |
| 1,5,1,1 SNV+DT | Intensive<br>feeding | 0  | 31 | 100%  | Intensive<br>feeding | 0 | 8 | 93.3% |
|                | Grazing              | 24 | 1  |       | Grazing              | 5 | 2 |       |
| 2,5,1,1 SNV+DT | Intensive<br>feeding | 0  | 31 | 98.2% | Intensive<br>feeding | 1 | 7 | 80%   |

No scatter: no scatter effect correction performed; SNV + DT: Standard Normal Variate and De-trending transformation.

4  
5  
6  
7
